# Supplementary figures and images for: Single-cell data analysis of malignant epithelial cell heterogeneity in lung adenocarcinoma for patient classification and prognosis prediction
Source: PubMed Central journal article supplement — Heliyon. 2023 Sep 18;9(9):e20164. doi: 10.1016/j.heliyon.2023.e20164 (PMC10559937; doi:10.1016/j.heliyon.2023.e20164), 2023-09-18

Figure 5A

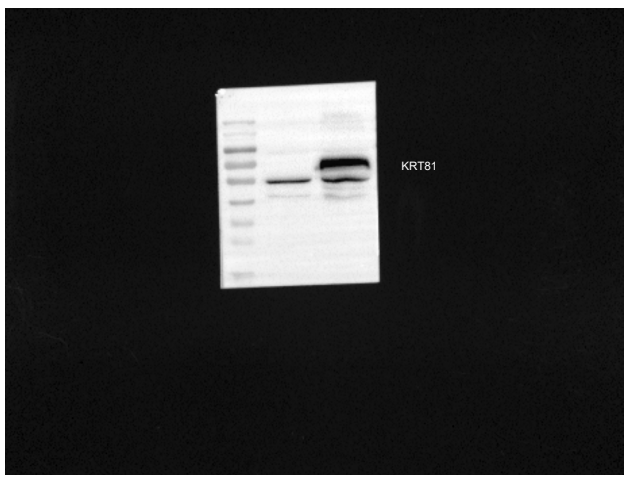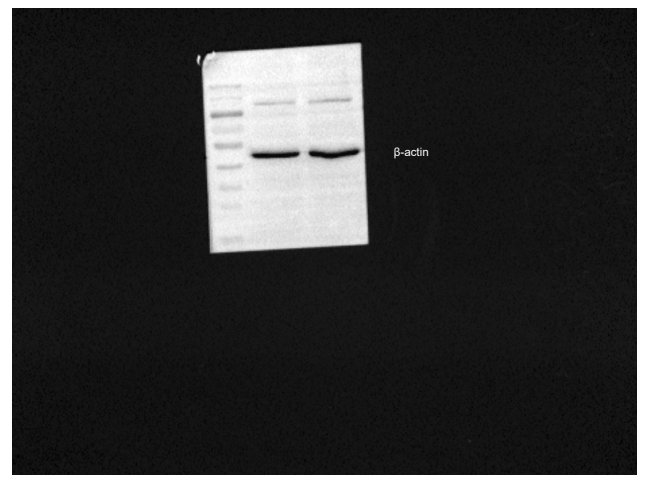

Figure 5B

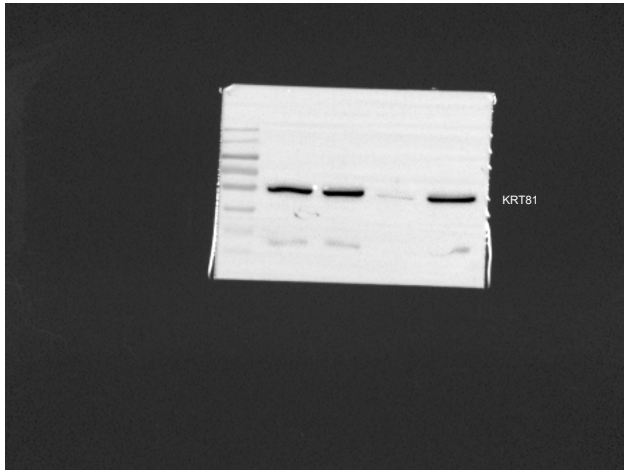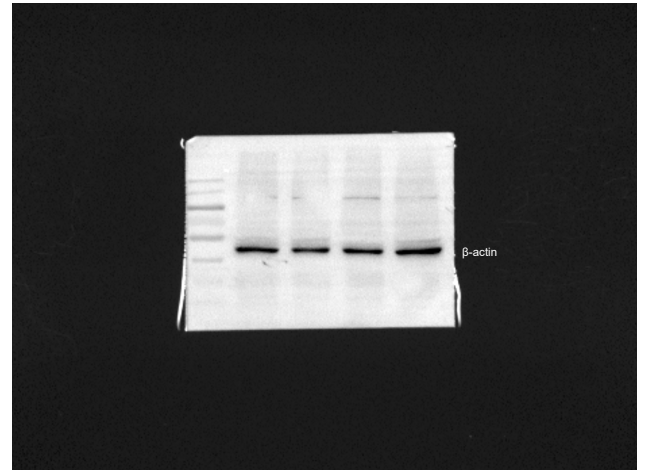

Figure 5C

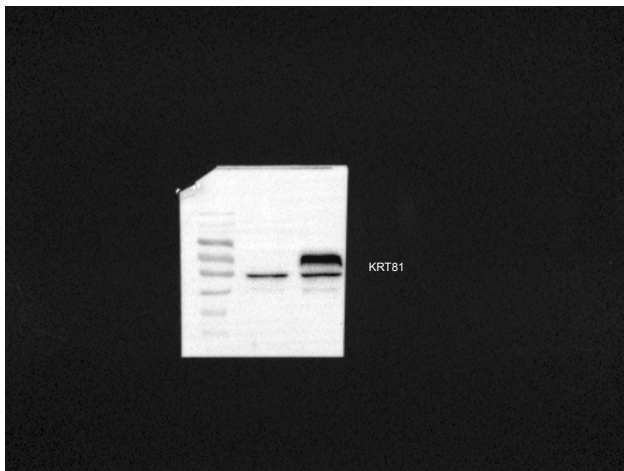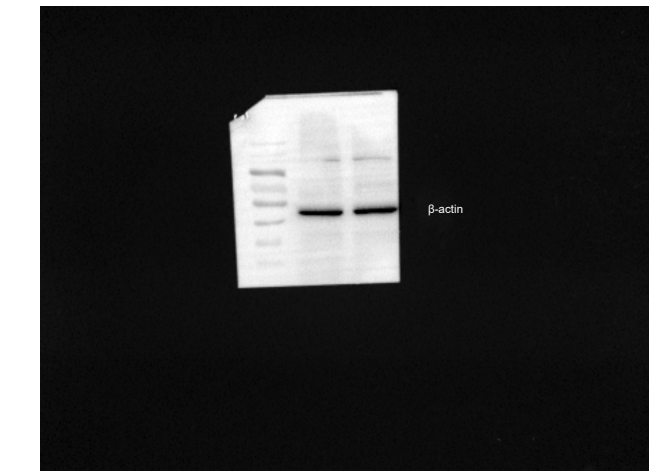

Figure 5D

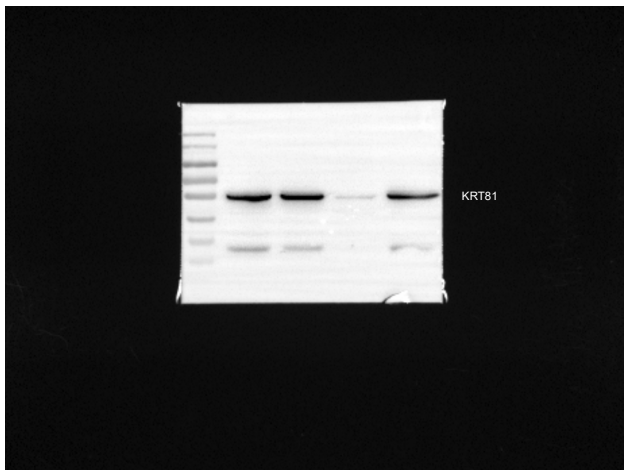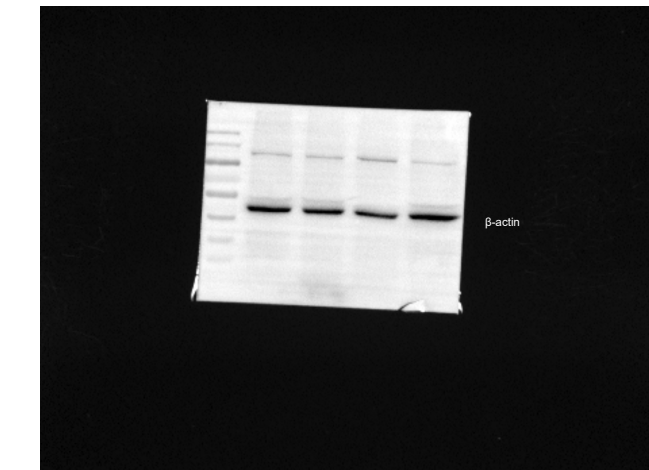

Supplement: mmc2.pdf [file mmc2.pdf]
